# Supplementary material for: CPX-351 Pharmacokinetics and Safety in Adults with Hematologic Malignancies and Renal Function Impairment: Phase 1 Trial
Source: MDPI journal article supplement (doi:10.3390/cancers16050915), 2024-02-24
Supplement: s1 [file s1]

## Supplementary Materials

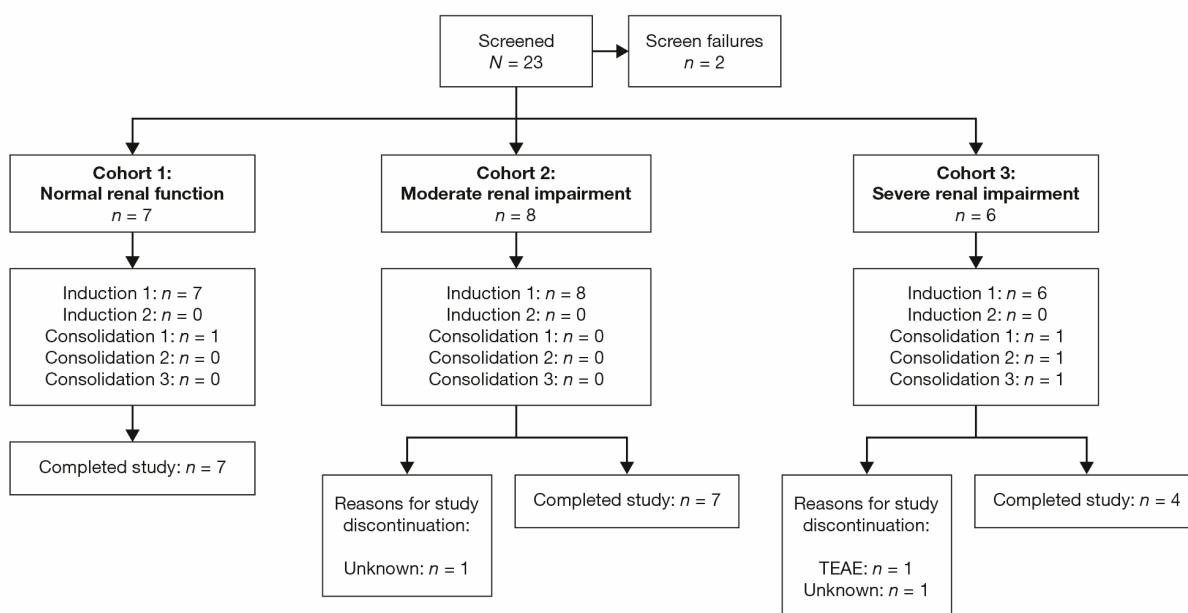

**Figure S1.** Patient disposition.

**Table S1.** Plasma pharmacokinetic parameters of the individual components of CPX-351 and their respective metabolites on day 5 (PK evaluable analysis set).

| Parameter <sup>a</sup>        | Cohort 1:<br>Normal Renal<br>Function<br>( <i>n</i> = 7) | Cohort 2:<br>Moderate Renal<br>Impairment<br>( <i>n</i> = 8) | Cohort 3:<br>Severe Renal<br>Impairment<br>( <i>n</i> = 6) |
|-------------------------------|----------------------------------------------------------|--------------------------------------------------------------|------------------------------------------------------------|
| <b>Cytarabine</b>             |                                                          |                                                              |                                                            |
| AUC <sub>tau</sub> (h×ng/mL)  | 1,325,000 (1,549,000 ± 920,200)                          | 1,213,000 (1,704,000 ± 1,004,000)                            | 1,330,000 (1,342,000 ± 203,100)                            |
| C <sub>max</sub> (ng/mL)      | 65,740 (74,260 ± 41,250)                                 | 52,330 (58,430 ± 21,890)                                     | 52,120 (52,380 ± 5,973)                                    |
| T <sub>max</sub> (h)          | 2.00 (0.60, 5.80)                                        | 2.00 (1.50, 24.40)                                           | 2.00 (2.00, 4.02)                                          |
| T <sub>1/2</sub> (h)          | 25.94 (31.71 ± 17.97)                                    | 24.47 (28.42 ± 15.35)                                        | 29.46 (29.92 ± 5.550)                                      |
| CL <sub>ss</sub> (mL/h)       | 168.1 (204.1 ± 138.9) <sup>b</sup>                       | 161.4 (380.9 ± 744.2)                                        | 135.5 (139.1 ± 31.36)                                      |
| <b>Ara-U</b>                  |                                                          |                                                              |                                                            |
| AUC <sub>0-48</sub> (h×ng/mL) | 37,660 (38,760 ± 10,100)                                 | 57,670 (59,400 ± 15,390)                                     | 76,700 (82,030 ± 31,220)                                   |
| C <sub>max</sub> (ng/mL)      | 1,113 (1,151 ± 339.9)                                    | 1,738 (1,888 ± 899.3)                                        | 1,836 (1,920 ± 599.5)                                      |
| T <sub>max</sub> (h)          | 8.00 (7.62, 8.07)                                        | 6.76 (2.97, 24.40)                                           | 7.89 (6.00, 8.00)                                          |
| T <sub>1/2</sub> (h)          | 52.75 (56.73 ± 20.53)                                    | 45.19 (50.13 ± 22.92)                                        | 44.31 (46.77 ± 19.28)                                      |
| Ratio_M/P                     | 0.02830 (0.03111 ± 0.01526)                              | 0.04735 (0.1196 ± 0.2455)                                    | 0.05739 (0.06198 ± 0.02751)                                |
| <b>Daunorubicin</b>           |                                                          |                                                              |                                                            |
| AUC <sub>tau</sub> (h×ng/mL)  | 524,100 (604,900 ± 352,100)                              | 495,000 (617,100 ± 311,000)                                  | 508,600 (518,000 ± 110,300)                                |
| C <sub>max</sub> (ng/mL)      | 29,900 (34,670 ± 23,520)                                 | 23,180 (25,000 ± 8,513)                                      | 22,290 (22,500 ± 3,486)                                    |
| T <sub>max</sub> (h)          | 2.00 (0.60, 4.13)                                        | 2.00 (1.52, 2.32)                                            | 2.00 (1.50, 2.00)                                          |
| T <sub>1/2</sub> (h)          | 17.40 (21.38 ± 13.09)                                    | 19.44 (21.85 ± 10.33)                                        | 21.41 (22.08 ± 5.794)                                      |
| CL <sub>ss</sub> (mL/h)       | 189.3 (220.6 ± 130.3)                                    | 173.8 (267.0 ± 366.9)                                        | 156.1 (162.1 ± 44.86)                                      |
| <b>Daunorubicinol</b>         |                                                          |                                                              |                                                            |
| AUC <sub>0-48</sub> (h×ng/mL) | 5,063 (5,844 ± 3,241)                                    | 6,634 (7,844 ± 4,600)                                        | 4,683 (4,750 ± 861.2)                                      |
| C <sub>max</sub> (ng/mL)      | 121.0 (136.3 ± 71.16)                                    | 197.7 (248.2 ± 167.4)                                        | 106.5 (107.9 ± 18.61)                                      |
| T <sub>max</sub> (h)          | 4.13 (0.60, 48.25)                                       | 16.90 (1.50, 48.05)                                          | 24.05 (0.00, 48.08)                                        |
| T <sub>1/2</sub> (h)          | 44.26 (46.96 ± 19.37)                                    | 36.90 (38.40 ± 11.91) <sup>b</sup>                           | 43.95 (44.92 ± 11.0) <sup>b</sup>                          |
| Ratio_M/P                     | 0.009624 (0.009727 ± 0.001572)                           | 0.01337 (0.01531 ± 0.008372)                                 | 0.009178 (0.009287 ± 0.001608)                             |

<sup>a</sup>All values are presented as geometric mean (arithmetic mean ± SD) except for T<sub>max</sub>, which is presented as median (min, max)

<sup>b</sup>For CL<sub>ss</sub>: Cohort 1 (normal), *n* = 5. Ara-U, arabinosyluracil; AUC<sub>0-48</sub>, area under the plasma concentration-time curve from time 0 to the time of the next dosing during a 48-hour interval; AUC<sub>tau</sub>, area under the plasma concentration-time curve over the dosing interval; CL<sub>ss</sub>, clearance at steady-state; C<sub>max</sub>, maximum observed concentration; Max, maximum; Min, minimum; PK, pharmacokinetic; Ratio\_M/P, AUC<sub>0-48</sub> for the respective metabolite/AUC<sub>tau</sub> for the respective parent drug; T<sub>1/2</sub>, terminal half-life; T<sub>max</sub>, time of C<sub>max</sub>.
